# Supplementary material
Source: publisher figshare collection journal article supplement (https://springernature.figshare.com/ndownloader/files/14097215)
Supplement: Supplementary file 1 [file 14097215]

## Sheet: Strains
Morris et al. 2018. P. syringae host range. BMC Phytopathology Research
Table S1 Strains of Pseudomonas syringae used in this study, the substrates from which they were isolated and the sources from which they were obtained
or that described them previously. Strains that were tested for motility and for which whole genome sequences were obtained are indicated.
		Origin			Test
Strain	Phylogroup	Diseased crop plant	other substrate	A-1998	B-2003	C-2013	D-2017	Motility test	IMG Genome ID1	Source2
11528	3	Nicotiana tabacum			+		+		2508501063	1
18882	1	Actinidia chinensis				+				7
0893_23	3	Aesculus hippocastanum			+	+	+		2508501056	1
1448A	3	Phaseolus vulgaris			+	+	+		637000223	1
41A	2	Prunus sp.				+	+		2713897189	12
5B530	2	Phaseolus vulgaris		+			+			2
9B1	2	Phaseolus vulgaris		+						2
AF0015	1	-	river water in a pristine region			+	+			3
B728a	2	Phaseolus vulgaris		+	+	+	+		637000224	2
BS002	7	Actinidia deliciosa				+				8
CC0001	2	Cucumis melo		+						2
CC0002	2	Cucumis melo		+			+			2
CC0004	2	Cucumis melo		+						2
CC0009	2	Cucumis melo		+						2
CC0023	2	Cucumis melo		+						2
CC0024	2	Cucumis melo		+						2
CC0040	2	Cucumis melo		+			+			2
CC0043	2	Cucumis melo		+			+			2
CC0062	2	Cucumis melo		+			+			2
CC0066	2	Cucumis melo		+						2
CC0070	2	Cucumis melo		+				+		2
CC0073	2	Cucumis melo		+						2
CC0074	2	Cucumis melo		+						2
CC0084	2	Cucumis melo		+						2
CC0085	2	Cucumis melo		+						2
CC0088	2	Cucumis melo		+						2
CC0094	2	Cucumis melo		+	+		+	+	2506783023	2
CC0101	2	Cucumis melo		+						2
CC0103	2	Cucumis melo		+						2
CC0111	2	Cucumis melo		+						2
CC0114	2	Cucumis melo		+						2
CC0125	2	Cucumis melo		+				+		2
CC0145	2	Cucumis melo		+				+		2
CC0159	2	Cucumis melo		+						2
CC0164	2	Cucumis melo		+						2
CC0393	2	-	agricultural irrigation lake		+					2
CC0440	2	Cucumis melo			+				2506783015	2
CC0457	2	Cucumis melo			+				2506783017	2
CC1416	1	-	epilithic biofilm		+				2524614589	4
CC1417	9	-	epilithic biofilm		+				2506783030	4
CC1458	2	-	Primula sp.		+				2506783018	4
CC1466	10	-	Primula sp.		+				2506783019	4
CC1498	2	-	fresh snow		+			+		4
CC1513	4	-	Hutchinsia alpina		+			+	2506783020	4
CC1524	9	-	mountain creek water		+				2506783021	4
CC1543	2	-	mountain lake water		+				2506783029	4
CC1544	1	-	mountain lake water		+	+		+	2506783022	4
CC1557	10	-	snow pack		+				2506783024	4
CC1559	1	-	snow pack		+				2506783032	4
CC1583	10	-	epilithic biofilm		+				2524614588	4
CC1629	4	Avena sativa			+			+	2524614586	4
CC1630	1	-	Onobrychis viciifolia		+				2524614587	4
CFBP1392	2	Syringa vulgaris		+						5
CFBP1617	2	Beta vulgaris		+						5
CFBP1622	2	Triticum aestivum		+						5
CFBP1634	1	Coffea arabica		+						5
CFBP1657	1	Brassica oleracea				+		+	2636415859	5
CFBP1702	1	Viburnum sp.				+		+	2630968584	5
CFBP1754	2	Malus sylvestris				+		+	2639762756	5
CFBP1788	2	Cucurbita maxima		+						5
CFBP1906	2	Beta vulgaris		+				+		5
CFBP2104	1	Cucumis sativus		+						5
CFBP2213	2	Triticum aestivum		+					2585427827	5
CFBP2256	2	Triticum aestivum		+						5
CFBP2258	2	Pisum sativum		+				+		5
CFBP2341	5	Coffea arabica		+					2667527432	5
CFBP2471	2	Beta vulgaris		+						5
CFBP2507	2	Beta vulgaris		+						5
NCPPB2585	2	Pisum sativum				+				10
CFBP2896	2	Hordeum vulgare		+						5
CFBP3205	3	Prunus amygdalus				+			2630968450	5
CFBP3225	3	Melia azedarach				+			2639762882	5
CFBP3226	3	Dendropanax trijidus				+		+	2728368923	5
CFBP3646	3	Phaseolus vulgaris			+					5
CFBP4060	1	Corylus avellana				+				5
CFBP4217	3	Castanea crenata				+			2728368926	5
CFBP4219	3	Daphniphyllum teijsmanni				+		+	2728368924	5
NCPPB4227	1	Corylus avellana				+				10
CFBP6109	3	Prunus sargentii				+			2713896850	5
CFBP70	3	Cucumis sativus		+						5
CFBP7286	1	Actinidia chinensis				+		+	2548876741	5
Cit7	2	Citrus sinensis			+				2508501064	1
CSZ0350	1	-	mountain creek water			+		+		11
DC3000	1	Solanum lycopersicum			+			+	2508501074	1
DSM50252	2	Beta vulgaris			+				2574179842	1
DSM50255	2	Triticum aestivum			+				2508501057	1
ES4326	5	Raphanus raphanistrum			+				2508501065	1
HRI 1704B	2	Pisum sativum			+				2508501061	1
ICMP3390	2	Cucurbita maxima		+						7
ICMP7501	2	Cucumis melo		+				+		7
IsPave037	2	Corylus avellana				+			2505313062	10
KG004	1	Actinidia chinensis				+		+		8
KN10	1	Solanum lycopersicum			+	+		+		1
KW30	1	Actinidia chinensis				+				9
M4	5	Raphanus raphanistrum			+				2645728030	1
MAFF301020	3	Morus bombycis			+	+		+	2508501059	1
MAFF301072 PT	2	Hordeum vulgare			+			+	2507262017	1
MAFF301315	3	Cucumis sativa			+			+	2507262018	1
MAFF302091 PT	1	Actinidia deliciosa			+			+	2508501055	1
MAFF302273PT	2	Acer sp.			+			+	2508501054	1
MAFF302278 PT	1	Cucumis sativa			+	+		+	2508501062	1
MAFF302280 PT	1	Prunus sp.			+	+		+	2508501060	1
1_6	4	Oryza sativa			+	+		+	2513020038	1
1644R	3	Vigna radiata			+				2548876787	1
NCPPB3335	3	Olea europaea				+				10
NCPPB3489	1	Corylus avellana				+				9
P004	2	Beta vulgaris					+			6
P005	2	Beta vulgaris					+			6
P013	2	Beta vulgaris					+			6
P016	2	Beta vulgaris					+	+		6
P017	2	Beta vulgaris					+	+		6
P018	2	Beta vulgaris					+			6
P021	2	Beta vulgaris					+	+		6
P022	2	Beta vulgaris					+	+		6
P023	2	Beta vulgaris					+	+		6
P026	2	Beta vulgaris					+			6
P027	2	Beta vulgaris					+			6
P040	2	Beta vulgaris					+			6
P049	2	Beta vulgaris					+			6
P053	2	Beta vulgaris					+	+		6
P057	2	Beta vulgaris					+	+		6
P071	2	Beta vulgaris					+			6
P073	2	Beta vulgaris					+			6
P074	2	Beta vulgaris					+			6
P095	2	Beta vulgaris					+			6
P102	2	Beta vulgaris					+			6
PA459	1	Actinidia chinensis				+			2548876749	8
PaVt10	1	Corylus avellana				+				8
PaVT28	1	Corylus avellana				+				8
PseNe107	3	Olea europaea				+		+	2651869699	8
R4a	3	Glycine max			+				2508501058	1
UB0303	2	-	river water		+				2507262002	1
USA0007	1	-	mountain creek water		+	+		+	2506783016	3
USA0011	2	-	mountain creek water		+			+	2509276053	3
NCPPB2445	P. corrugata	Solanum lycopersicum				+				10
	1IMG Genome ID refers to the reference numbers of genomes available on the Joint Genome Institute Integrated Microbial Genomes & Microbiomes
	data base, https://img.jgi.doe.gov/
	2Sources
	1	Strains were kindly provied by Jeff Dangl, University of North Carolina, Chapelle Hill.
	2	Morris CE, Glaux C, Latour X, Gardan L, Samson R, Pitrat M: The relationship of host range, physiology, and genotype to virulence on cantaloupe in Pseudomonas syringae from cantaloupe blight epidemics in France. Phytopathology 2000, 90:636-646
	3	Morris CE, Sands DC, Vanneste JL, Montarry J, Oakley B, Guilbaud C, Glaux C: Inferring the evolutionary history of the plant pathogen Pseudomonas syringae from its biogeography in headwaters of rivers in North America, Europe and New Zealand. mBio 2010, 1(3): e00107-10-e00107-20
	4	Morris CE, Kinkel LL, Kun X, Prior P, Sands DC: A surprising niche for the plant pathogen Pseudomonas syringae. Infection, Genetics and Evolution 2007, 7:84-92
	5	Collection Française de Bactérie Phytopathogène (https://www6.inra.fr/cirm_eng/CFBP-Plant-Associated-Bacteria)
	6	Collected from four cultivars of sugar beet in 2013 at 12 locations in Serbia
	7	International Collection of Microorganisms from Plants (https://www.landcareresearch.co.nz/resources/collections/icmp)
	8	Department of Agriculture and Forest Sciences, Tuscia University, Viterbo, Italy
	9	Strains were kindly provided by Marco Scortichini, Council for Agricultural Research and Agricultural Economy Analysis, Rome, Italy
	11	National Collection of Plant Pathogenic Bacteria (https://www.fera.co.uk/ncppb)
	12	Berge O, Monteil CL, Bartoli C, Chandeysson C, Guilbaud C, Sands DC, Morris CE: A user’s guide to a data base of the diversity of Pseudomonas syringae and its application to classifying strains in this phylogenetic complex. PLoS ONE 2014, 9:(9): e105547. doi:105510.101371/journal.pone.010554
	13	This strain was isolated from an apricot tree with symptoms of bacterial canker in the Rhone-Alpes region of France
